# Supplementary material for: A novel extraction device for efficient clean-up of molecularly imprinted polymers
Source: Royal Society of Chemistry journal article supplement (doi:10.1039/c2ay05821a), 2012-01-01
Supplement: c2ay05821a.pdf [file c2ay05821a.pdf]

# A Novel Extraction Device for Efficient Clean-Up of Molecularly Imprinted Polymers

Stefan Eppler, Michael Stegmaier, Florian Meier and Boris Mizaikoff\*

## Supplementary Information

### Soxhlet Extraction of the Iohexol MIPs

2 g of iohexol MIP were extracted for 4 h via soxhlet extraction. The same solvent mixture used for the ULEX extraction was taken (50% acetonitrile 50% H<sub>2</sub>O (v/v)) and boiled at 130 °C.

100 mg of the extracted and dried polymer was taken, resuspended in 1 mL of the solvent and shaken for 1,5 h. The sample was centrifuged and the iohexol concentration of the supernatant solution was quantified via HPLC.

The sample revealed an iohexol concentration of 81 µg/mL, and thus clearly indicated insufficient extraction of iohexol from the MIP matrix. The chromatogram of the sample is shown in Figure 1.

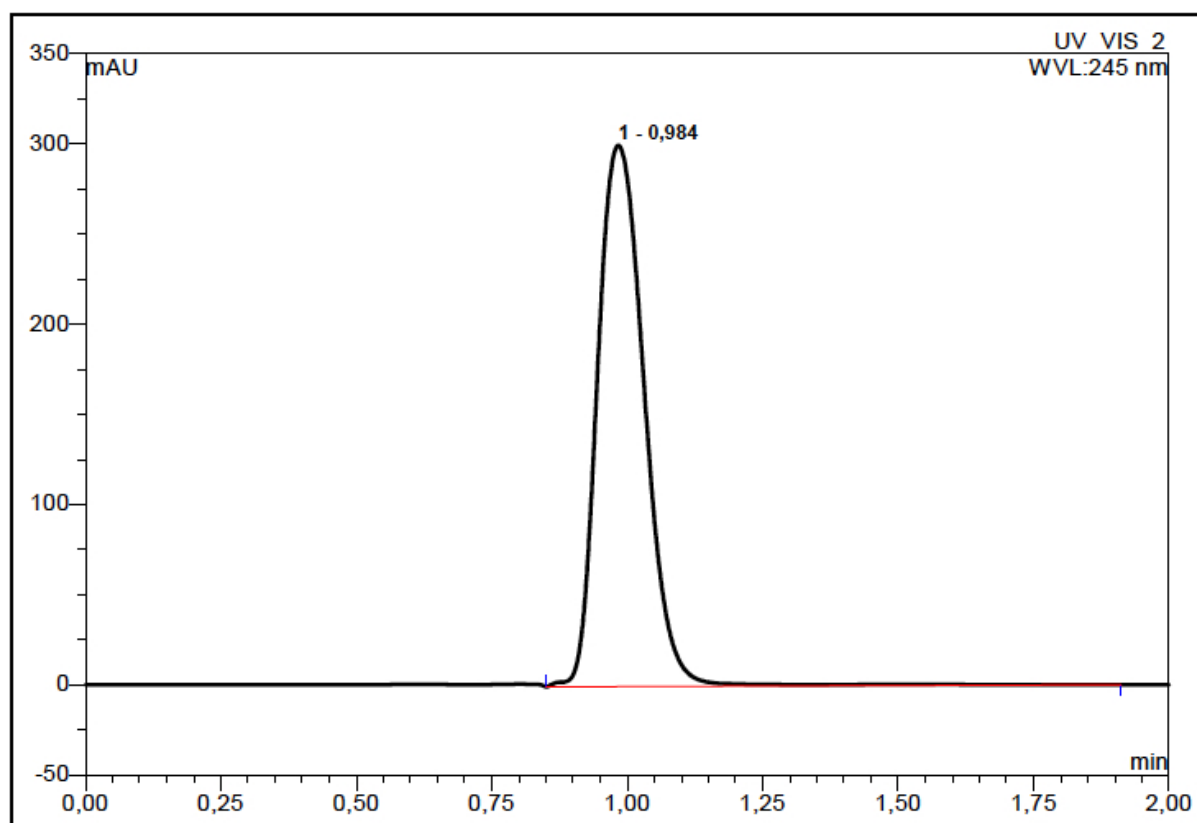

**Figure S1:** Chromatogram of the MIP supernatant solution extracted with soxhlet extraction. Dionex HPLC system with a Phenomenex Luna cyano column (2 mL/min; 75 % acetonitrile / 25 % H<sub>2</sub>O (v/v)) analyzing 20 µL with an UV-detector at 245 nm. Retention time of 0.984 min and a peak area of 30.8 mAU\*min.
